# Supplementary material for: Adoption of the 2A Ribosomal Skip Principle to Track Assembled Virions of Pepper Mild Mottle Virus in Nicotiana benthamiana
Source: MDPI journal article supplement (doi:10.3390/plants13070928), 2024-03-22
Supplement: s1 [file s1]

## Supplementary Material:

### PMMoV:

35S×2

GTAAATTTTTCACAATTTAACAACAACAACACAAACAACAACATTACAAACAATTAC  
AACTACA(PMMoV-5' UTR)

ATGGCTTACACACAACAAGCTACCAACGCCGCATTAGCAAGTACTCTCCGAGGGAACAACC  
CCTTGGTGAACGATCTTGCTAATCGGAGACTGTACGAATCAGCGGTGCAACAATGCAATGC  
ACATGACCGCAGGCCCAAGGTTAATTTTTTAAGGTCGATAAGCGAAGAGCAGACGCTTATC  
GCAACTAAGGCCTACCCTGAGTTCCAAATTACGTTCTACAACACGCAGAACGCTGTGCACAG  
TCTCGCAGGTGGACTTCGGTCTTTGGAAGTAGAATACTTGATGATGCAGATCCCCTATGGTT  
CAACGACATACGATATCGGGGGAAATTTTGCTGCTCACATGTTTAAAGGTCGTGACTACGTT  
CATTGTTGCATGCCTAATATGGACTTACGTGACGTCATGCGTCACAATGCTCAAAGGATAG  
CATTGAACTGTACCTTTCAAAGCTTGCGCAAAAGAAAAAGGTAATACCGCCATATCAAAAG  
CCAGTCTTTGATAAATACACGGACGATCCGCAATCGGTAGTGTGCTCGAAACCTTTCCAGCA  
CTGCGAAGGCGTTTCGCACTGCACGGATAAAGTATACGCTGTCGCTTTGCACAGTTTATACG  
ACATTCCAGCAGATGAATTTGGTGCAGCACTTCTGAGGAGAAATGTTTATGTCTGTTATGCT  
GCCTTCCACTTTTCTGAGAATCTTCTTTTAGAAGATTTCGTATGTTAGTCTTGACGACATAGGC  
GCTTTCTTCTCGAGAGAGGGTGATATGTTGAACTTTTCTTTGTAGCAGAGAGTACTTTAAAT  
TATACTCATTCTATAGTAATGTGCTTAAGTATGTGTGTAAGACTTACTTCCCCGCTTCTAGT  
AGAGAAGTGTACATGAAGGAGTTTTTGGTAACTAGGGTAAATACTTGGTTTTGTAAGTTTTT  
AAGGTTAGATACCTTTGTACTATATAGAGGTGTGTACCACAGAGGTGTAGACAAGGAGCAA  
TTTTATAGTGCAATGGAAGATGCTTGGCATTACAAAAAGACTTTGGCGATGATGAATAGCGA  
AAGGATCCTCTTGGAGGATTCATCGTCTGTTAATTATTGGTTTCCAAAGATGAAAGATATGG  
TGATAGTACCTTTGTTTCGACGTATCTTTACAGAACGAGGGGAAAAGGTTAGCAAGAAAGGA  
GGTTATGGTCAGCAAGGACTTCGTTTATACTGTGCTTAATCATATTCGCACATACCAGTCGA  
AAGCGCTTACTTACGCCAATGTATTATCGTTTCGTTGAGTCGATAAGATCAAGAGTGATAATT  
AATGGGGTGACTGCTCGCTCAGAGTGGGATGTGGACAAGGCTTTGTTGCAGTCTCTGTCAAT  
GACCTTTTTCTTGACAGACCAAATTGGCCATGCTCAAAGATGACCTCGTGGTTCAAAAATTTT  
AAGTGCATTCTAAATCGCTCACTGAATATGTCTGGGATGAGATTACTGCCGCTTTTCACAACT  
GTTTTCTACAATCAAGGAGAGGTTGATTAACAAGAACTCATAACTGTTTCGGAAAAGGCT  
CTTGAAATTAAGTACCTGACTTATATGTGACTTTCCACGACAGATTAGTTAAAGAGTACAA  
GTCTTCAGTGGAATGCCGGTACTGGACGTTAAAAAGAGCTTGGAAGAAGCGGAAGTGATG  
TACAATGCTTTGTCAGAAATCTCAATTCTTAAGGATAGTGACAAGTTTGATGTTGATGTTTTT  
TCCCGAATGTGTAATACTTTAGGCGTAGATCCATTGGTGGCAGCAAAGGTAATGGTAGCCGT  
GGTTTCAAATGAGAGTGGTTTGACCTTAACGTTTGAGCGGCCTACCGAAGCAAATGTGCGAC  
TTGCATTGCAACCGACAATTGCATCAAAGGAGGAAGGTTTATTAAAGATTGTGTCGTCAGAC  
GTAGGTGAGTCCTCAATCAAGGAAGTGGTCCGAAAATCGGAGATTTCTATGCTAGGTCTAA  
CAGGCAGCACAGTGTCCGATGAGTTCCAAAGAAGTACAGAAATCGAGTCGTTGCAGCAGTT  
CCATATGGTATCCACAGAGACGATTATCCGTAAACAGATGCATGCGATGGTGTATACTGGTC  
CGCTAAAAGTTCAACAATGCAAGAACTATTTAGACAGCCTAGTAGCCTCGCTCTCTGCTGCG  
GTATCAAACCTGAAGAAGATAATCAAGGACACAGCTGCGATAGATCTCGAGACTAAGGAA

AAATTTGGAGTCTACGACGTGTGCCTTAAGAAATGGTTGGTGAAACCTCAATCGAAAGGAC  
ATGCTTGGGGTGTGGTGATGGACTCAGACTATAAGTGCTTTGTAGCGCTTCTCACATACGAT  
GGCGAGAACATTGTGTGCGGAGAGACATGGCGTAGAGTCGCAGTGAGCTCCGAATCTTTGG  
TGTATTAGATATGGGGAAGATAAGAGCTATACGCTCAGTGCTTAAAGACGGTGAACCCCA  
TATAAGTAGTGCAAAGGTTACACTTGTGTGATGGTGTTCAGGTTGCGGGAAGACAAAGGAG  
ATTCTTTCGAGGGTCAACTTTGACGAAGATCTGGTTCTAGTACCAGGAAAACAGGCTGCCGA  
AATGATAAAAAGAAGAGCAAACAGTTCTGGTTTAATCGTGCGGACCAAGGAGAACGTAAG  
GACGGTAGACTCTTCTTAATGAATTACGGTCGAGGTCCGTGCCAATACAAAAGGCTGTTTC  
TGGATGAAGGTCTAATGTTACACCCCGTTGTGTTAATTTCTGGTTGGCATGTCTCTATGCT  
CCGAGGCTTTTGTATTATGGAGACACCCAGCAGATTCTTACATCAACAGAGTTGCAACTTTTC  
CCTATCCTAAGCATTGAGTCAACTCGAGGTCGATGCTGTTGAGACTCGCAGAACAACATTG  
CGGTGTCCGGCTGATATCACCTTCTTCTGAATCAGAAGTACGAAGGGCAAGTTATGTGCAC  
ATCAAGTGTTACACGCTCGGTGTACACGAGGTCATCCAAGGTGCAGCAGTAATGAATCCA  
GTGTCTAAACCACTTAAAGGGAAGGTGATTACATTCACTCAATCAGACAAGTCATTGCTGCT  
CTCAAGGGGTTACGAAGATGTGCATACCGTTCATGAGGTGCAAGGGGAAACGTTTGAAGAC  
GTCTCATTAGTGAGATTGACGCCTACACCCGTGGGAATAATTTCAAAGCAGAGTCCGCACCT  
GTTGGTCTCGTTGTCTAGGCATACAAGGTCAATCAAATATTACACTGTTGTACTAGATGCAG  
TCGTTTCAGTGCTTAGAGATTGGAGTGTGTGAGTAGTTACCTGTTAGATATGTACAAAGTT  
GATGTGTCGACTCAATAG(PMMoV-p126)

CAATTACAGATAGAATCGGTGTACAAAGGTGTTAACCTTTTCGTCGCAGCCCCGAAAACAG  
GAGATGTTTCTGACATGCAATATTACTATGACAAGTGTTGCCGGGAAACAGTACTATACTT  
AATGAGTATGATGCTGTAACATGCAAATACGAGAAAATAATTTGAATGTCAAGGATTGTGT  
GTTGGATATGTCGAAGTCGGTGCCTCTTCCGAGAGAATCTGAGACGACATTGAAACCTGTG  
ATCAGGACTGCTGCTGAAAAACCTCGAAAACCTGGATTGTTGAAAACTTGGTCGCGATGA  
TCAAAAGAAATTTCAACTCTCCCGAATTAATAGGGTCTGTCGACATCGAAGACACCGCTTCT  
CTAGTAGTAGATAAGTTTTTGTATGCATACTTTATTAAGAAAAGAAAAAACCTAAAAATAT  
ACCTCTGCTTTCAGGGGCGAGTTTGGAAAGATGGATAGAAAAGCAAGAAAAGTCGACGATT  
GGCCAGTTGGCTGATTTTGACTTTATTGATCTTCCAGCCGTTGATCAATATAGGCACATGATC  
AAGCAGCAGCCGAAACAGCGTCTAGATCTTAGTATTCAAACCTGAATACCCGGCTTTGCAAA  
CTATTGTGTATCATAGCAAGAAAATCAATGCGCTTTTTGGTCCTGTATTTTCAGAAATTAACAA  
GACAACTGCTAGAGTCAATTGACAGTTCGAGATTCATGTTTTATACAAGGAAAACGCCTACA  
CAGATCGAAGAGTTTTTCTCAGATCTGGACTCTAATGTTCTATGGACATATTAGAGCTGGA  
CATTTCCAAGTATGACAAATCACAGAACGAATTTCAATTGTGCAGTTGAGTATGAGATTTGGA  
AAAGGTTAGGCTTAGACGATTTCTTGCCGAAGTTTGAAACACGGGCATCGGAAGACAAC  
GTTGAAAGACTACACAGCCGGAATAAAAACGTGTTTGTGGTATCAAAGGAAAAGTGGTGAT  
GTCACCACATTCATTGGAACACGATCATTATTGCTGCATGTCTGTCCTCTATGCTACCGATG  
GAGAGATTGATTAAAGGTGCCTTTTGTGGTGATGATAGTATACTATACTTTCCAAAGGGCAC  
TGATTTCCCTGATATTCAACAGGGTGCAAATCTTCTCTGGAATTTGAAGCCAAGTTGTTTCAG  
GAAGAGATATGGTTACTTTTGCGGTAGGTACATAATCCACCATGACAGAGGTTGTATTGTAT  
ATTATGACCCTCTAAAATTGATCTCGAAACTCGGTGCTAAACACATCAAGAATAGAGAACAT  
TTAGAGGAATTTAGAACCTCTCTTTGTGATGTTGCTGGGTGCTTGAACAATTGTGCGTACTAT  
ACACATTTGGACGACGCTGTCCGGTGAGGTTATTAACACCGCACCTCCTGGTTCGTTTGTAT  
AGAGCATTAGTTAAGTACTTGTGTGATAAAAGGTTGTTTCAAACATTGTTTCTGGAATAA  
(PMMoV-Readthrough domain)

ATGGCGTTAGTAGTCAAGGATGACGTTAAGATTTCTGAGTTCATCAATTTGTCTACCGCTGA  
GAAATTCCTTACCTGCTGTTATGACTTCGGTCAAGACGGTACGAATTCGAAAGTTGACAAAG  
TGATTGCAATGGAAAACGATTGTTATCCGATGTAGATTTGCTTAAAGGTGTTAAGCTTGTT  
AAAGATGGTTATGTGTGTTTGGCAGGGTTAGTTGTGTCCGGGGAGTGGAACCTACCGGACA  
ACTGCAGAGGTGGAGTAAGCGTTTGTGTTGGTTGACAAGAGAATGCAAAGAGATGACGAAG  
CAACACTTGGATCTTATAGAACCAGTGCGGCTAAGAAACGATTTGCCTTCAAATTGATCCCG  
AATTATAGCATTACTACCGCCGATGCTGAGAGAAATGTTTGGCAAGTTTTAGTTAATATTAG  
AGGTGTTGCCATGGAAAAGGGTTTCTGTCTTTATCTTTGGAGTTTGTCTCAGTTTGTATTGT  
ACACAAATCCAATATAAAATTAGGCTTGAGAGAGAAAATTACTAGTGTGTCGGAAGGAGGA  
CCCGTTGAACTTACAGAAGCAGTTGTTGATGAGTTCATCGAATCAGTTCCAATGGCTGACAG  
ATTACGTAAATTTGCAATCAATCCAAGAAAAGAAGTAATAAGTATGTAGGTAAGAGAAAT  
GATAATAAGGGTGTGAATAAGGAAAGGAAGCTGTTTGATAAGGTTAGAATTGGGCAGAACT  
CGGAGTCATCGGACGCCGAGTCTTCTTCGTTTTAA (PMMoV-Movement protein)

CT

ATGGCTTACACAGTTTCCAGTGCCAATCAATTAGTGTATTTAGGTTCTGTATGGGCCGATCCA  
TTAGAGTTACAAAATCTATGTACTTCGGCGTTAGGTAATCAGTTTCAAACACAGCAGGCTAG  
AACTACGGTTCAACAGCAGTTCTCTGATGTGTGGAAGACTATACCGACCGCTACAGTTAGAT  
TTCCCGCTACTGGTTTCAAAGTTTTCCGATATAATGCCGTGCTAGATTCTCTAGTGTGCGCAC  
TTCTCGGAGCCTTTGATACTAGGAATAGGATAATAGAAGTAGAAAATCCGCAAATCCTAC  
AACTGCCGAGACGCTTGATGCGACGAGGCGGGTAGATGATGCGACGGTGGCCATTAGGGC  
CAGTATAAGTAACCTCATGAATGAGTTAGTTCGTGGCACGGGAATGTACAATCAAGCTCTGT  
TCGAGAGCGCGAGTGGACTCACCTGGGCTACAACCTCCTTAG (PMMoV-Coat protein)

ACATGATGGTGTAATAAGTTGGACGAACGTTAAACGTCCGTGGCGAGTACGATAACTCGT  
AGTGTTTTTCCCTCCACTTAAATCGAAGGGTTGTCGTTAGGATGGAACGCAATTAAATACAT  
GTGTGACGTGTATTTGCGAACGACGTAATTATTTTCAGGGGTTGCAATCCCCCCCCGAACCGC  
GGGTAGCGGCCC (PMMoV-3' UTR)

HDV RZ-NOS terminator

## PMMoV-GFP:

35S×2

GTAAATTTTTCACAATTTAACAACAACAACACAAACAACAACAACATTACAAACAAATTAC  
AACTACA(PMMoV-5' UTR)

ATGGCTTACACACAACAAGCTACCAACGCCGCATTAGCAAGTACTCTCCGAGGGAACAACC  
CCTTGGTGAACGATCTTGCTAATCGGAGACTGTACGAATCAGCGGTCAACAATGCAATGC  
ACATGACCGCAGGCCCAAGGTTAATTTTTTAAGGTCGATAAGCGAAGAGCAGACGCTTATC  
GCAACTAAGGCCTACCCTGAGTTCCAAATTACGTTCTACAACACGCAGAACGCTGTGCACAG  
TCTCGCAGGTGGACTTCGGTCTTTGGAAGTACTAGTATGATGATGCAGATCCCTATGGTT  
CAACGACATACGATATCGGGGGAAATTTTGCTGCTCACATGTTTAAAGGTCGTGACTACGTT  
CATTGTTGCATGCCTAATATGGACTTACGTGACGTCATGCGTCACAATGCTCAAAGGATAG  
CATTGAACTGTACCTTTCAAAGCTTGCGCAAAAGAAAAAGGTAATACCGCCATATCAAAAG  
CCAGTCTTTGATAAATACACGGACGATCCGCAATCGGTAGTGTGCTCGAAACCTTTCCAGCA  
CTGCGAAGGCGTTTCGCACTGCACGGATAAAGTATACGCTGTCGCTTTGCACAGTTTATACG  
ACATTCCAGCAGATGAATTTGGTGCAGCACTTCTGAGGAGAAATGTTTATGTCTGTTATGCT  
GCCTTCCACTTTTCTGAGAATCTTCTTTTAGAAGATTTCGTATGTTAGTCTTGACGACATAGGC  
GCTTTCTTCTCGAGAGAGGGTGATATGTTGAACTTTTCTTTGTAGCAGAGAGTACTTTAAAT  
TATACTCATTCTATAGTAATGTGCTTAAGTATGTGTGTAAGACTTACTTCCCCGCTTCTAGT  
AGAGAAGTGTACATGAAGGAGTTTTTGGTAACTAGGGTAAATACTTGGTTTTGTAAGTTTTT  
AAGGTTAGATACCTTTGTACTATATAGAGGTGTGTACCACAGAGGTGTAGACAAGGAGCAA  
TTTTATAGTGCAATGGAAGATGCTTGGCATTACAAAAAGACTTTGGCGATGATGAATAGCGA  
AAGGATCCTCTTGAGAGGATTCATCGTCTGTTAATTATTGGTTTTCAAAGATGAAAGATATGG  
TGATAGTACCTTTGTTGACGTATCTTTACAGAACGAGGGGAAAAGGTTAGCAAGAAAGGA  
GGTTATGGTCAGCAAGGACTTCGTTTATACTGTGCTTAATCATATTCGCACATACCAGTCGA  
AAGCGCTTACTTACGCCAATGTATTATCGTTGCTTGAGTCGATAAGATCAAGAGTGATAATT  
AATGGGGTGACTGCTCGCTCAGAGTGGGATGTGGACAAGGCTTTGTTGCAGTCTCTGTCAAT  
GACCTTTTTCTTGACAGACCAAATTGGCCATGCTCAAAGATGACCTCGTGGTTCAAAAATTTT  
AAGTGCATTCTAAATCGCTCACTGAATATGTCTGGGATGAGATTACTGCCGCTTTTCACAACT  
GTTTTCTACAATCAAGGAGAGGTTGATTAACAAGAACTCATACTGTTTCGGAAAAGGCT  
CTTGAAATTAAGTACCTGACTTATATGTGACTTTCCACGACAGATTAGTTAAAGAGTACAA  
GTCTTCAGTGGAATGCCGGTACTGGACGTTAAAAAGAGCTTGGAAGAAGCGGAAGTGATG  
TACAATGCTTTGTCAGAAATCTCAATCTTAAGGATAGTGACAAGTTTGATGTTGATGTTTTT  
TCCCGAATGTGTAATACTTTAGGCGTAGATCCATTGGTGGCAGCAAAGGTAATGGTAGCCGT  
GGTTTCAAATGAGAGTGGTTTGACCTTAACGTTTGAGCGGCCTACCGAAGCAAATGTCGCAC  
TTGCATTGCAACCGACAATTGCATCAAAGGAGGAAGGTTTATTAAAGATTGTGTCGTCAGAC  
GTAGGTGAGTCCTCAATCAAGGAAGTGGTCCGAAAATCGGAGATTTCTATGCTAGGTCTAA  
CAGGCAGCACAGTGTCCGATGAGTTCCAAAGAAGTACAGAAATCGAGTCGTTGCAGCAGTT  
CCATATGGTATCCACAGAGACGATTATCCGTAAACAGATGCATGCGATGGTGTATACTGGTC  
CGCTAAAAGTTCAACAATGCAAGAACTATTTAGACAGCCTAGTAGCCTCGCTCTCTGCTGCG  
GTATCAAACCTGAAGAAGATAATCAAGGACACAGCTGCGATAGATCTCGAGACTAAGGAA  
AAATTTGGAGTCTACGACGTGTGCCTTAAGAAATGGTTGGTGAAACCTCAATCGAAAGGAC  
ATGCTTGGGGTGTGGTGATGGACTCAGACTATAAGTGCTTTGTAGCGCTTCTCACATACGAT  
GGCGAGAACATTGTGTGCGGAGAGACATGGCGTAGAGTCGCAGTGAGCTCCGAATCTTTGG

TGTATTCAGATATGGGGAAGATAAGAGCTATACGCTCAGTGCTTAAAGACGGTGAACCCCA  
TATAAGTAGTGCAAAGGTTACACTTGTTGATGGTGTTCAGGTTGCGGGAAGACAAAGGAG  
ATTCTTTGAGGGTCAACTTTGACGAAGATCTGGTTCTAGTACCAGGAAAACAGGCTGCCGA  
AATGATAAAAAGAAGAGCAAACAGTTCTGGTTTAATCGTGGCGACCAAGGAGAACGTAAG  
GACGGTAGACTCTTTCTTAATGAATTACGGTCGAGGTCCGTGCCAATACAAAAGGCTGTTTC  
TGGATGAAGGTCTAATGTTACACCCCGGTTGTGTTAATTTTCTGGTTGGCATGTCTCTATGCT  
CCGAGGCTTTTGTATGAGACACCCAGCAGATTCTTACATCAACAGAGTTGCAACTTTTC  
CCTATCCTAAGCATTGAGTCAACTCGAGGTCGATGCTGTTGAGACTCGCAGAACAACATTG  
CGGTGTCCGGCTGATATCACCTTCTTCTGAATCAGAAGTACGAAGGGCAAGTTATGTGCAC  
ATCAAGTGTTACACGCTCGGTGTCACACGAGGTCATCCAAGGTGCAGCAGTAATGAATCCA  
GTGTCTAAACCACTTAAAGGGAAGGTGATTACATTCATCAATCAGACAAGTCATTGCTGCT  
CTCAAGGGGTTACGAAGATGTGCATACCGTTCATGAGGTGCAAGGGGAAACGTTTGAAGAC  
GTCTCATTAGTGAGATTGACGCCTACACCCGTGGGAATAATTTCAAAGCAGAGTCCGCACCT  
GTTGGTCTCGTTGTCTAGGCATACAAGGTCAATCAAATATTACACTGTTGTACTAGATGCAG  
TCGTTTCAGTGCTTAGAGATTTGGAGTGTGTGAGTAGTTACCTGTTAGATATGTACAAAGTT  
GATGTGTCGACTCAATAG(PMMoV-p126)

CAATTACAGATAGAATCGGTGTACAAAGGTGTTAACCTTTTCGTCGCAGCCCCGAAAACAG  
GAGATGTTTCTGACATGCAATATTACTATGACAAGTGTTGCCGGGAAACAGTACTATACTT  
AATGAGTATGATGCTGTAACCTATGCAAATACGAGAAAATAATTTGAATGTCAAGGATTGTGT  
GTTGGATATGTCGAAGTCGGTGCCTCTTCCGAGAGAATCTGAGACGACATTGAAACCTGTG  
ATCAGGACTGCTGCTGAAAAACCTCGAAAACCTGGATTGTTGGAAAACCTGGTCGCGATGA  
TCAAAAGAAATTTCAACTCTCCCGAATTAATAGGGGTCGTCGACATCGAAGACACCGCTTCT  
CTAGTAGTAGATAAGTTTTTGTATGCATACTTTATTAAGAAAAGAAAAAACCTAAAAATAT  
ACCTCTGCTTTCAAGGGCGAGTTTGGAAAGATGGATAGAAAAGCAAGAAAAGTCGACGATT  
GGCCAGTTGGCTGATTTTGACTTTATTGATCTTCCAGCCGTTGATCAATATAGGCACATGATC  
AAGCAGCAGCCGAAACAGCGTCTAGATCTTAGTATTCAAACCTGAATACCCGGCTTTGCAAA  
CTATTGTGTATCATAGCAAGAAAATCAATGCGCTTTTTGGTCCTGTATTTTCAGAAATTAACAA  
GACAACCTGCTAGAGTCAATTGACAGTTCGAGATTCATGTTTTATACAAGGAAAACGCCTACA  
CAGATCGAAGAGTTTTTCTCAGATCTGGACTCTAATGTTCTATGGACATATTAGAGCTGGA  
CATTTCCAAGTATGACAAATCACAGAACGAATTTCAATTGTGCAGTTGAGTATGAGATTTGGA  
AAAGGTTAGGCTTAGACGATTTCTTGCCGAAGTTTGGAAACACGGGCATCGGAAGACAAC  
GTTGAAAGACTACACAGCCGGAATAAAAACGTGTTTGTGGTATCAAAGGAAAAGTGGTGAT  
GTCACCACATTCATTGGAACACGATCATTATTGCTGCATGTCTGTCCTCTATGCTACCGATG  
GAGAGATTGATTAAAGGTGCCTTTTGTGGTGATGATAGTATACTATACTTTCCAAAGGGCAC  
TGATTTCCCTGATATTCAACAGGGTGCAAATCTTCTCTGGAATTTGAAGCCAAGTTGTTTCAG  
GAAGAGATATGGTTACTTTTGCGGTAGGTACATAATCCACCATGACAGAGGTTGTATTGTAT  
ATTATGACCCTCTAAAATTGATCTCGAAACTCGGTGCTAAACACATCAAGAATAGAGAACAT  
TTAGAGGAATTTAGAACCTCTCTTTGTGATGTTGCTGGGTCGTTGAACAATTGTGCGTACTAT  
ACACATTTGGACGACGCTGTCGGTGAGGTTATTAACACCGCACCTCCTGGTTCGTTTGTAT  
AGAGCATTAGTTAAGTACTTGTGTGATAAAAGGTTGTTTCAAACATTGTTTCTGGAATAA  
(PMMoV-Readthrough domain)

ATGGCGTTAGTAGTCAAGGATGACGTTAAGATTTCTGAGTTCATCAATTTGTCTACCGCTGA  
GAAATCTTACCTGCTGTTATGACTTCGGTCAAGACGGTACGAATTTGAAAGTTGACAAAG  
TGATTGCAATGGAAAACGATTCGTTATCCGATGTAGATTGCTTAAAGGTGTTAAGCTTGTT

AAAGATGGTTATGTGTGTTTGGCAGGGTTAGTTGTGTCCGGGGAGTGGAACCTACCGGACA  
ACTGCAGAGGTGGAGTAAGCGTTTGTGTTGGTTGACAAGAGAATGCAAAGAGATGACGAAG  
CAACACTTGGATCTTATAGAACCAGTGCGGCTAAGAAACGATTTGCCTTCAAATTGATCCCG  
AATTATAGCATTACTACCGCCGATGCTGAGAGAAATGTTTGGCAAGTTTTAGTTAATATTAG  
AGGTGTTGCCATGGAAAAGGGTTTCTGTCCTTTATCTTTGGAGTTTGTCTCAGTTTGTATTGT  
ACACAAATCCAATATAAAATTAGGCTTGAGAGAGAAAATTACTAGTGTGTCGGAAGGAGGA  
CCCGTTGAACTTACAGAAGCAGTTGTTGATGAGTTCATCGAATCAGTTCCAATGGCTGACAG  
ATTACGTAAATTTTCGCAATCAATCCAAGAAAAGAAGTAATAAGTATGTAGGTAAGAGAAAT  
GATAATAAGGGTGTGAATAAGGAAAGGAAGCTGTTTGATAAGGTTAGAATTGGGCAGAACT  
CGGAGTCATCGGACGCCGAGTCTTCTTCGTTTTAA (PMMoV-Movement protein)

CT

ATGAAGACTAATCTTTTTCTTTCTCATCTTTTCACTTCTCCTATCATTATCCTCGGCCGAATT  
CAGTAAAGGAGAAGAACTTTTCACTGGAGTTGTCCCAATTCTTGTTGAATTAGATGGTGATG  
TTAATGGGCACAAATTTTCTGTCAGTGGAGAGGGTGAAGGTGATGCAACATACGGAAAAC  
TACCCTTAAATTTATTTGCACTACTGGAAAACCTGTTCCATGGCCAACACTTGTCACTAC  
TTTCTCTTATGGTGTTCATGCTTTTCAAGATACCCAGATCATATGAAGCGGCACGACTTCTT  
CAAGAGCGCCATGCCTGAGGGATACGTGCAGGAGAGGACCATCTTCTTCAAGGACGACGG  
GAACTACAAGACACGTGCTGAAGTCAAGTTTGAGGGAGACACCCTCGTCAACAGGATCGAG  
CTTAAGGGAATCGATTTCAAGGAGGACGGAAACATCCTCGGCCACAAGTTGGAATACAAC  
ACAACCTCCACAACGTATACATCATGGCCGACAAGCAAAAGAACGGCATCAAAGCCAACCTT  
CAAGACCCGCCACAACATCGAAGACGGCGGCGTGCAACTCGCTGATCATTATCAACAAAAT  
ACTCCAATTGGCGATGGCCCTGTCCTTTTACCAGACAACCATTACCTGTCCACACAATCTGCC  
CTTTCGAAAGATCCCAACGAAAAGAGAGACCACATGGTCCTTCTTGAGTTTGTAAACAGCTGC  
TGGGATTACACATGGCATGGATGAACTATACAAACATGATGAGCTTTAA (Green  
fluorescent protein)

CGAGGGGTAGTCAAGATGCATAATAAATAACGGATTGTGTCCGTAATCACACGTGGTGCGT  
ACGATAACGCATAGTGTTTTTCCCTCCACTTAAATCGAAGGGTTGTGTCTTGGATCGCGCGG  
GTCAAATGTATATGGTTCATATACATCCGCAGGCACGTAATAAAGCGAGGGGTTCTG (TMV-3'  
UTR)

GGTCGAGGTCGGCTGTGAAACTCGAAAAGGTTCCGGAAAACAAAAAAGAGAGTGGTAGGT  
AATAGTGTTAATAATAAGAAAATAAATAATAGTGGTAAGAAAGGTTTGAAAGTTGAGGAAA  
TTGAGGATAATGTAAGTGATGACGAGTCTATCGCGTCATCGAGTACGTTTTAA (Segment of  
TMGMV-subgenome promoter of CP)

CT

ATGGCTTACACAGTTTCCAGTGCCAATCAATTAGTGTATTTAGGTTCTGTATGGGCCGATCCA  
TTAGAGTTACAAAATCTATGTACTTCGGCGTTAGGTAATCAGTTTCAAACACAGCAGGCTAG  
AACTACGGTTCAACAGCAGTTCTCTGATGTGTGGAAGACTATACCGACCGCTACAGTTAGAT  
TTCCCGCTACTGGTTTCAAAGTTTTCCGATATAATGCCGTGCTAGATTCTCTAGTGTGCGCAC  
TTCTCGGAGCCTTTGATACTAGGAATAGGATAATAGAAGTAGAAAATCCGCAAAATCCTAC  
AACTGCCGAGACGCTTGATGCGACGAGGCGGGTAGATGATGCGACGGTGGCCATTAGGGC  
CAGTATAAGTAACCTCATGAATGAGTTAGTTCGTGGCACGGGAATGTACAATCAAGCTCTGT  
TCGAGAGCGCGAGTGGACTCACCTGGGCTACAACCTCCTTAG (PMMoV-Coat protein)

ACATGATGGTGTAATAAGTTGGACGAACGTTAAACGTCCGTGGCGAGTACGATAACTCGT  
AGTGTTTTTCCCTCCACTTAAATCGAAGGGTTGTCGTTAGGATGGAACGCAATTAAATACAT

GTGTGACGTGTATTTGCGAACGACGTAATTATTTTCAGGGGTTCGAATCCCCCGAACCGC  
GGGTAGCGGCCC (PMMoV-3' UTR)  
HDV RZ-NOS terminator

## PMMoV-GFP<sup>2A</sup>:

35S×2

GTAAATTTTTCACAATTTAACAACAACAACACAAACAACAACAACATTACAAACAATTAC  
AACTACA(PMMoV-5' UTR)

ATGGCTTACACACAACAAGCTACCAACGCCGCATTAGCAAGTACTCTCCGAGGGAACAACC  
CCTTGGTGAACGATCTTGCTAATCGGAGACTGTACGAATCAGCGGTCAACAATGCAATGC  
ACATGACCGCAGGCCCAAGGTTAATTTTTTAAGGTCGATAAGCGAAGAGCAGACGCTTATC  
GCAACTAAGGCCTACCCTGAGTTCCAAATTACGTTCTACAACACGCAGAACGCTGTGCACAG  
TCTCGCAGGTGGACTTCGGTCTTTGGAAGTACTAGTATGATGATGCAGATCCCTATGGTT  
CAACGACATACGATATCGGGGAAATTTTGCTGCTCACATGTTTAAAGGTCGTGACTACGTT  
CATTGTTGCATGCCTAATATGGACTTACGTGACGTCATGCGTCACAATGCTCAAAAGGATAG  
CATTGAACTGTACCTTTCAAAGCTTGCGCAAAAGAAAAAGGTAATACCGCCATATCAAAAG  
CCAGTCTTTGATAAATACACGGACGATCCGCAATCGGTAGTGTGCTCGAAACCTTTCCAGCA  
CTGCGAAGGCGTTTCGCACTGCACGGATAAAGTATACGCTGTCGCTTTGCACAGTTTATACG  
ACATTCCAGCAGATGAATTTGGTGCAGCACTTCTGAGGAGAAATGTTTCATGTCTGTTATGCT  
GCCTTCCACTTTTCTGAGAATCTTCTTTTAGAAGATTTCGTATGTTAGTCTTGACGACATAGGC  
GCTTTCTTCTCGAGAGAGGGTGATATGTTGAACTTTTCTTTGTAGCAGAGAGTACTTTAAAT  
TATACTCATTCTATAGTAATGTGCTTAAGTATGTGTGTAAGACTTACTTCCCCGCTTCTAGT  
AGAGAAGTGTACATGAAGGAGTTTTTGGTAACTAGGGTAAATACTTGGTTTTGTAAGTTTTC  
AAGGTTAGATACCTTTGTACTATATAGAGGTGTGTACCACAGAGGTGTAGACAAGGAGCAA  
TTTTATAGTGCAATGGAAGATGCTTGGCATTACAAAAAGACTTTGGCGATGATGAATAGCGA  
AAGGATCCTCTTGAGGATTTCATCGTCTGTTAATTATTGGTTTTCAAAGATGAAAGATATGG  
TGATAGTACCTTTGTTGACGTATCTTTACAGAACGAGGGGAAAAGGTTAGCAAGAAAGGA  
GGTTATGGTCAGCAAGGACTTCGTTTATACTGTGCTTAATCATATTCGCACATACCAGTCGA  
AAGCGCTTACTTACGCCAATGTATTATCGTTGCTTGAGTCGATAAGATCAAGAGTGATAATT  
AATGGGGTGACTGCTCGCTCAGAGTGGGATGTGGACAAGGCTTTGTTGCAGTCTCTGTCAAT  
GACCTTTTTCTTGACAGACCAAATTGGCCATGCTCAAAGATGACCTCGTGGTTCAAAAATTTT  
AAGTGCATTCTAAATCGCTCACTGAATATGTCTGGGATGAGATTACTGCCGCTTTTCACAAC  
GTTTTCTACAATCAAGGAGAGGTTGATTAACAAGAACTCATAACTGTTTCGGAAAAGGCT  
CTTGAAATTAAGTACCTGACTTATATGTGACTTTCCACGACAGATTAGTTAAAGAGTACAA  
GTCTTCAGTGGAATGCCGGTACTGGACGTTAAAAAGAGCTTGGAAGAAGCGGAAGTGATG  
TACAATGCTTTGTCAGAAATCTCAATCTTAAGGATAGTGACAAGTTTGATGTTGATGTTTTT  
TCCCGAATGTGTAATACTTTAGGCGTAGATCCATTGGTGGCAGCAAAGGTAATGGTAGCCGT  
GGTTTCAAATGAGAGTGGTTTGACCTTAACGTTTGAGCGGCCTACCGAAGCAAATGTCGCAC  
TTGCATTGCAACCGACAATTGCATCAAAGGAGGAAGGTTTATTAAAGATTGTGTCGTCAGAC  
GTAGGTGAGTCCTCAATCAAGGAAGTGGTCCGAAAATCGGAGATTTCTATGCTAGGTCTAA  
CAGGCAGCACAGTGTCCGATGAGTTCCAAAGAAGTACAGAAATCGAGTCGTTGCAGCAGTT  
CCATATGGTATCCACAGAGACGATTATCCGTAAACAGATGCATGCGATGGTGTATACTGGTC  
CGCTAAAAGTTCAACAATGCAAGAACTATTTAGACAGCCTAGTAGCCTCGCTCTCTGCTGCG  
GTATCAAACCTGAAGAAGATAATCAAGGACACAGCTGCGATAGATCTCGAGACTAAGGAA  
AAATTTGGAGTCTACGACGTGTGCCTTAAGAAATGGTTGGTGAAACCTCAATCGAAAGGAC  
ATGCTTGGGGTGTGGTGATGGACTCAGACTATAAGTGCTTTGTAGCGCTTCTCACATACGAT  
GGCGAGAACATTGTGTGCGGAGAGACATGGCGTAGAGTCGCAGTGAGCTCCGAATCTTTGG



TGTATTCAGATATGGGGAAGATAAGAGCTATACGCTCAGTGCTTAAAGACGGTGAACCCCA  
TATAAGTAGTGCAAAGGTTACACTTGTTGATGGTGTTCAGGTTGCGGGAAGACAAAGGAG  
ATTCTTTGAGGGTCAACTTTGACGAAGATCTGGTTCTAGTACCAGGAAAACAGGCTGCCGA  
AATGATAAAAAGAAGAGCAAACAGTTCTGGTTTAATCGTGGCGACCAAGGAGAACGTAAG  
GACGGTAGACTCTTTCTTAATGAATTACGGTCGAGGTCCGTGCCAATACAAAAGGCTGTTTC  
TGGATGAAGGTCTAATGTTACACCCCGGTTGTGTTAATTTTCTGGTTGGCATGTCTCTATGCT  
CCGAGGCTTTTGTATGAGACACCCAGCAGATTCTTACATCAACAGAGTTGCAACTTTTC  
CCTATCCTAAGCATTGAGTCAACTCGAGGTCGATGCTGTTGAGACTCGCAGAACAACATTG  
CGGTGTCCGGCTGATATCACCTTCTTCTGAATCAGAAGTACGAAGGGCAAGTTATGTGCAC  
ATCAAGTGTTACACGCTCGGTGTCACACGAGGTCATCCAAGGTGCAGCAGTAATGAATCCA  
GTGTCTAAACCACTTAAAGGGAAGGTGATTACATTCATCAATCAGACAAGTCATTGCTGCT  
CTCAAGGGGTTACGAAGATGTGCATACCGTTCATGAGGTGCAAGGGGAAACGTTTGAAGAC  
GTCTCATTAGTGAGATTGACGCCTACACCCGTGGGAATAATTTCAAAGCAGAGTCCGCACCT  
GTTGGTCTCGTTGTCTAGGCATACAAGGTCAATCAAATATTACACTGTTGTACTAGATGCAG  
TCGTTTCAGTGCTTAGAGATTTGGAGTGTGTGAGTAGTTACCTGTTAGATATGTACAAAGTT  
GATGTGTCGACTCAATAG(PMMoV-p126)

CAATTACAGATAGAATCGGTGTACAAAGGTGTTAACCTTTTCGTCGCAGCCCCGAAAACAG  
GAGATGTTTCTGACATGCAATATTACTATGACAAGTGTTGCCGGGAAACAGTACTATACTT  
AATGAGTATGATGCTGTAACCTATGCAAATACGAGAAAATAATTTGAATGTCAAGGATTGTGT  
GTTGGATATGTCGAAGTCGGTGCCTCTTCCGAGAGAATCTGAGACGACATTGAAACCTGTG  
ATCAGGACTGCTGCTGAAAAACCTCGAAAACCTGGATTGTTGGAAAACCTGGTCGCGATGA  
TCAAAAGAAATTTCAACTCTCCCGAATTAATAGGGGTCGTCGACATCGAAGACACCGCTTCT  
CTAGTAGTAGATAAGTTTTTGTATGCATACTTTATTAAGAAAAGAAAAAACCTAAAAATAT  
ACCTCTGCTTTCAAGGGCGAGTTTGGAAAGATGGATAGAAAAGCAAGAAAAGTCGACGATT  
GGCCAGTTGGCTGATTTTGACTTTATTGATCTTCCAGCCGTTGATCAATATAGGCACATGATC  
AAGCAGCAGCCGAAACAGCGCTAGATCTTAGTATTCAAACCTGAATACCCGGCTTTGCAAA  
CTATTGTGTATCATAGCAAGAAAATCAATGCGCTTTTTGGTCCTGTATTTTCAGAAATTAACAA  
GACAACCTGCTAGAGTCAATTGACAGTTCGAGATTCATGTTTTATACAAGGAAAACGCCTACA  
CAGATCGAAGAGTTTTTCTCAGATCTGGACTCTAATGTTCTATGGACATATTAGAGCTGGA  
CATTTCCAAGTATGACAAATCACAGAACGAATTTCAATTGTGCAGTTGAGTATGAGATTTGGA  
AAAGGTTAGGCTTAGACGATTTCTTGCCGAAGTTTGGAAACACGGGCATCGGAAGACAAC  
GTTGAAAGACTACACAGCCGGAATAAAAACGTGTTTGTGGTATCAAAGGAAAAGTGGTGAT  
GTCACCACATTCATTGGAACACGATCATTATTGCTGCATGTCTGTCTCTATGCTACCGATG  
GAGAGATTGATTAAAGGTGCCTTTTGTGGTGATGATAGTATACTATACTTTCCAAAGGGCAC  
TGATTTCCCTGATATTCAACAGGGTGCAAATCTTCTCTGGAATTTGAAGCCAAGTTGTTTCAG  
GAAGAGATATGGTTACTTTTGCGGTAGGTACATAATCCACCATGACAGAGGTTGTATTGTAT  
ATTATGACCCTCTAAAATTGATCTCGAACTCGGTGCTAAACACATCAAGAATAGAGAACAT  
TTAGAGGAATTTAGAACCTCTCTTTGTGATGTTGCTGGGTCGTTGAACAATTGTGCGTACTAT  
ACACATTTGGACGACGCTGTCGGTGAGGTTATTAACACCGCACCTCCTGGTTCGTTTGTAT  
AGAGCATTAGTTAAGTACTTGTGTGATAAAAGGTTGTTTCAAACATTGTTTCTGGAATAA  
(PMMoV-Readthrough domain)

ATGGCGTTAGTAGTCAAGGATGACGTTAAGATTTCTGAGTTCATCAATTTGTCTACCGCTGA  
GAAATCTTACCTGCTGTTATGACTTCGGTCAAGACGGTACGAATTTGAAAGTTGACAAAG  
TGATTGCAATGGAAAACGATTCGTTATCCGATGTAGATTGCTTAAAGGTGTTAAGCTTGT

AAAGATGGTTATGTGTGTTTGGCAGGGTTAGTTGTGTCCGGGGAGTGGAACCTACCGGACA  
ACTGCAGAGGTGGAGTAAGCGTTTGTGGTTGACAAGAGAATGCAAAGAGATGACGAAG  
CAACACTTGGATCTTATAGAACCAGTGCGGCTAAGAAACGATTTGCCTTCAAATTGATCCCG  
AATTATAGCATTACTACCGCCGATGCTGAGAGAAATGTTTGGCAAGTTTTAGTTAATATTAG  
AGGTGTTGCCATGGAAAAGGGTTTCTGTCCTTTATCTTTGGAGTTTGTCTCAGTTTGTATTGT  
ACACAAATCCAATATAAAATTAGGCTTGAGAGAGAAAATTACTAGTGTGTCGGAAGGAGGA  
CCCGTTGAACTTACAGAAGCAGTTGTTGATGAGTTCATCGAATCAGTTCCAATGGCTGACAG  
ATTACGTAAATTTTCGCAATCAATCCAAGAAAAGAAGTAATAAGTATGTAGGTAAGAGAAAT  
GATAATAAGGGTGTGAATAAGGAAAGGAAGCTGTTTGATAAGGTTAGAATTGGGCAGAACT  
CGGAGTCATCGGACGCCGAGTCTTCTTCGTTTTAA (PMMoV-Movement protein)

**CT**

ATGAAGACTAATCTTTTTCTCTTCTCATCTTTTCACTTCTCCTATCATTATCCTCGGCCGAATT  
CAGTAAAGGAGAAGAACTTTTCACTGGAGTTGTCCCAATTCTTGTTGAATTAGATGGTGATG  
TTAATGGGCACAAATTTTCTGTCAAGTGGAGAGGGTGAAGGTGATGCAACATACGGAAAAC  
TACCCTTAAATTTATTTGCACTACTGGAAAACCTGTTCCATGGCCAACACTTGTCACTAC  
TTTCTCTTATGGTGTTCATGCTTTTCAAGATACCCAGATCATATGAAGCGGCACGACTTCTT  
CAAGAGCGCCATGCCTGAGGGATACGTGCAGGAGAGGACCATCTTCTTCAAGGACGACGG  
GAACTACAAGACACGTGCTGAAGTCAAGTTTGAGGGAGACACCCTCGTCAACAGGATCGAG  
CTTAAGGGAATCGATTTCAAGGAGGACGGAAACATCCTCGGCCACAAGTTGGAATACAAC  
ACAACCTCCACAACGTATACATCATGGCCGACAAGCAAAAGAACGGCATCAAAGCCAACCTT  
CAAGACCCGCCACAACATCGAAGACGGCGGCGTGCAACTCGCTGATCATTATCAACAAAAT  
ACTCCAATTGGCGATGGCCCTGTCCTTTACCAGACAACCATTACCTGTCCACACAATCTGCC  
CTTTCGAAAGATCCCAACGAAAAGAGAGACCACATGGTCCTTCTTGAGTTTGTAAACAGCTGC  
TGGGATTACACATGGCATGGATGAACTATACAAACATGATGAGCTT (Green fluorescent  
protein)

**CAGCTGTTGAATTTTGACCTTCTTAAGCTTGCGGGAGACGTCGAGTCCAACCCTGGGCCC**

**(2A)**

ATGGCTTACACAGTTTCCAGTGCCAATCAATTAGTGTATTTAGGTTCTGTATGGGCCGATCCA  
TTAGAGTTACAAAATCTATGTACTTCGGCGTTAGGTAATCAGTTTCAAACACAGCAGGCTAG  
AACTACGGTTCAACAGCAGTTCTCTGATGTGTGGAAGACTATACCGACCGCTACAGTTAGAT  
TTCCCGCTACTGGTTTCAAAGTTTCCGATATAATGCCGTGCTAGATTCTCTAGTGTGCGCAC  
TTCTCGGAGCCTTTGATACTAGGAATAGGATAATAGAAGTAGAAAATCCGCAAAATCCTAC  
AACTGCCGAGACGCTTGATGCGACGAGGCGGGTAGATGATGCGACGGTGGCCATTAGGGC  
CAGTATAAGTAACCTCATGAATGAGTTAGTTCGTGGCACGGAATGTACAATCAAGCTCTGT  
TCGAGAGCGCGAGTGGACTCACCTGGGCTACAACCTCCTTAG (PMMoV-Coat protein)

ACATGATGGTGTAATAAGTTGGACGAACGTTAAACGTCCGTGGCGAGTACGATAACTCGT  
AGTGTTTTTCCCTCCACTTAAATCGAAGGGTTGTCGTTAGGATGGAACGCAATTAAATACAT  
GTGTGACGTGTATTTGCGAACGACGTAATTATTTTCAGGGGTTTCAATCCCCCCCCGAACCGC  
GGGTAGCGGCCC (PMMoV-3' UTR)

**HDV RZ-NOS terminator**
