# Supplementary figures and images for: Adoption of the 2A Ribosomal Skip Principle to Track Assembled Virions of Pepper Mild Mottle Virus in Nicotiana benthamiana
Source: MDPI journal article supplement (doi:10.3390/plants13070928), 2024-03-22

2 day

4 day

6 day

8 day

PMMoV-GFP<sup>2A</sup>

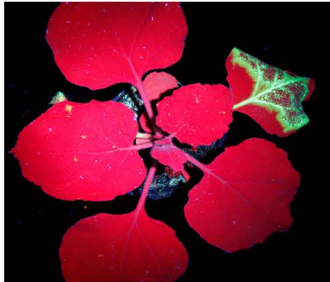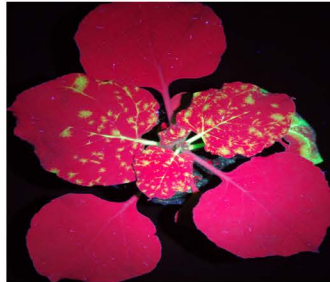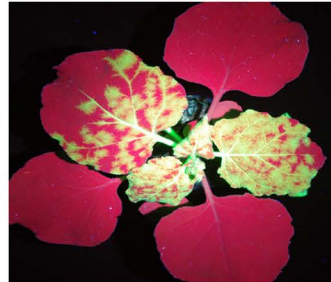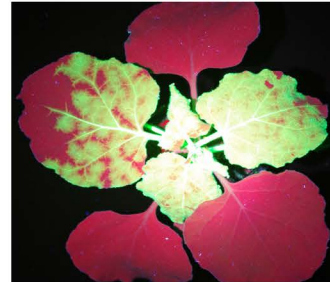

PMMoV-GFP

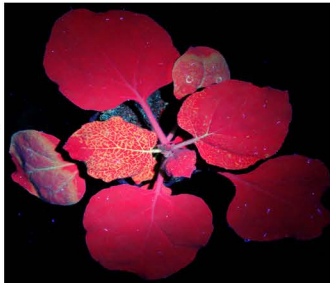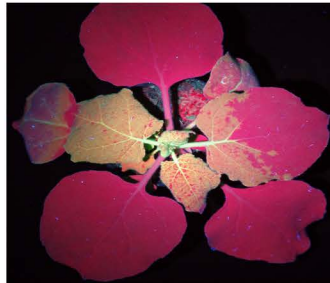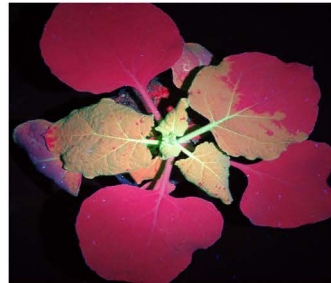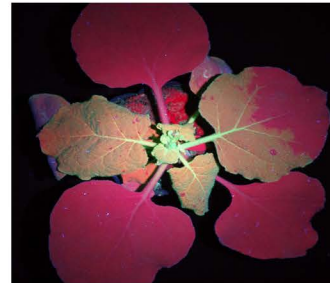

PMMoV

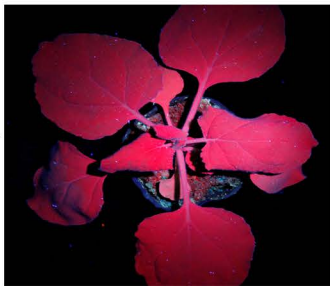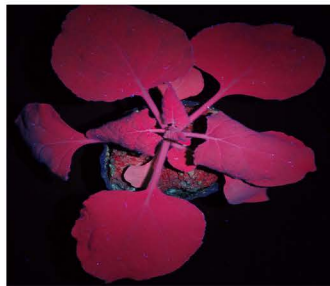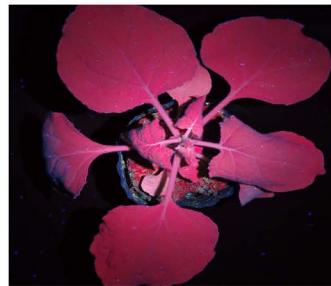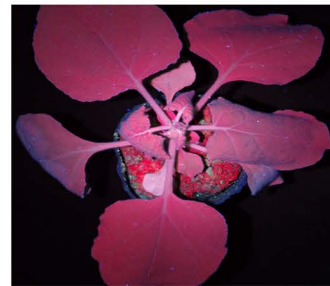

Supplement: s1 [file s1]
